# Supplementary material
Source: PubMed Central journal article supplement (PMC7288753)
Supplement: NIHMS1595616-supplement-SI.pdf [file NIHMS1595616-supplement-SI.pdf]

*Supporting Information*

**Cell-Permeable Cyclic Peptidyl Inhibitor against the Keap1-Nrf2 Interaction**

*Heba Salim,<sup>†</sup> Jian Song,<sup>†,‡</sup> Ashweta Sahni,<sup>†</sup> and Dehua Pei<sup>†,\*</sup>*

<sup>†</sup>Department of Chemistry and Biochemistry, The Ohio State University, 484 West 12<sup>th</sup> Avenue, Columbus, Ohio 43210, USA.

<sup>‡</sup>School of Pharmacy, Guangdong Pharmaceutical University, Guangzhou, Guangdong Province 510006, P. R. China

\*Corresponding author. Phone: 614-688-4068; E-mail: [pei.3@osu.edu](mailto:pei.3@osu.edu)

**Table of Contents**

|                        |     |
|------------------------|-----|
| <b>Figure S1</b> ..... | S2  |
| <b>Figure S2</b> ..... | S13 |
| <b>Figure S3</b> ..... | S14 |
| <b>Figure S4</b> ..... | S15 |
| <b>Figure S5</b> ..... | S15 |





Crude peptide on semi-preparative reversed-phase HPLC (monitored at 214 nm):

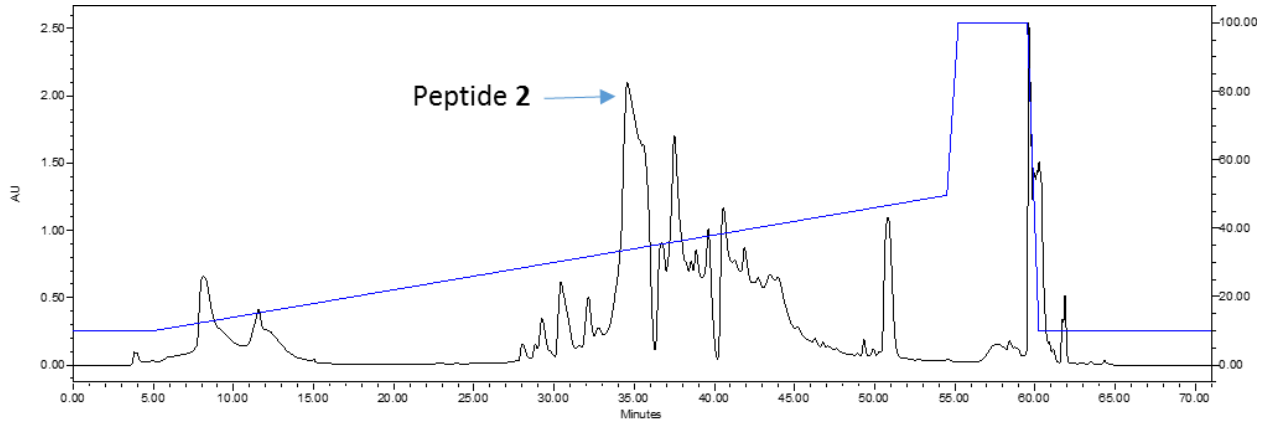

Purity check (analytical reversed-phase HPLC at 214 nm):

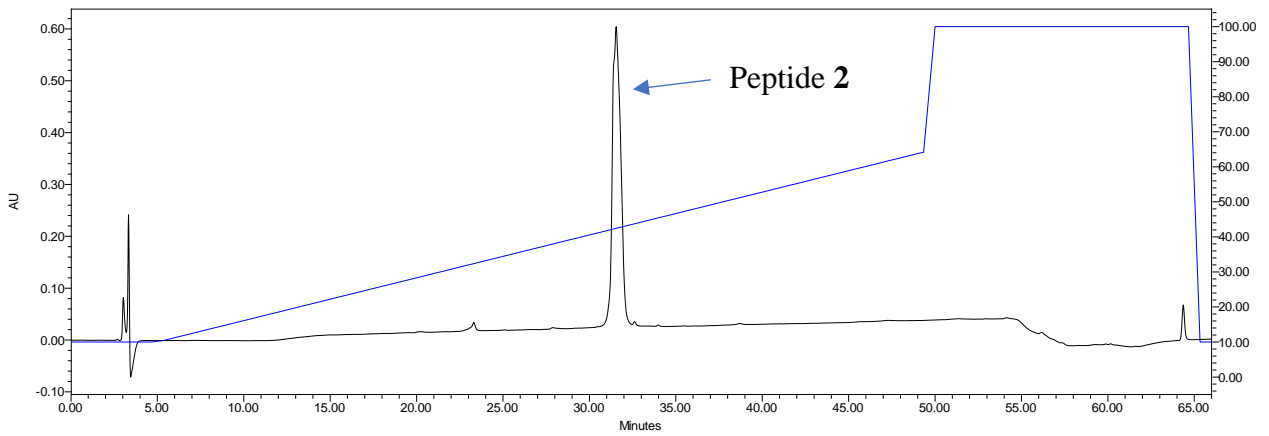

HRMS:

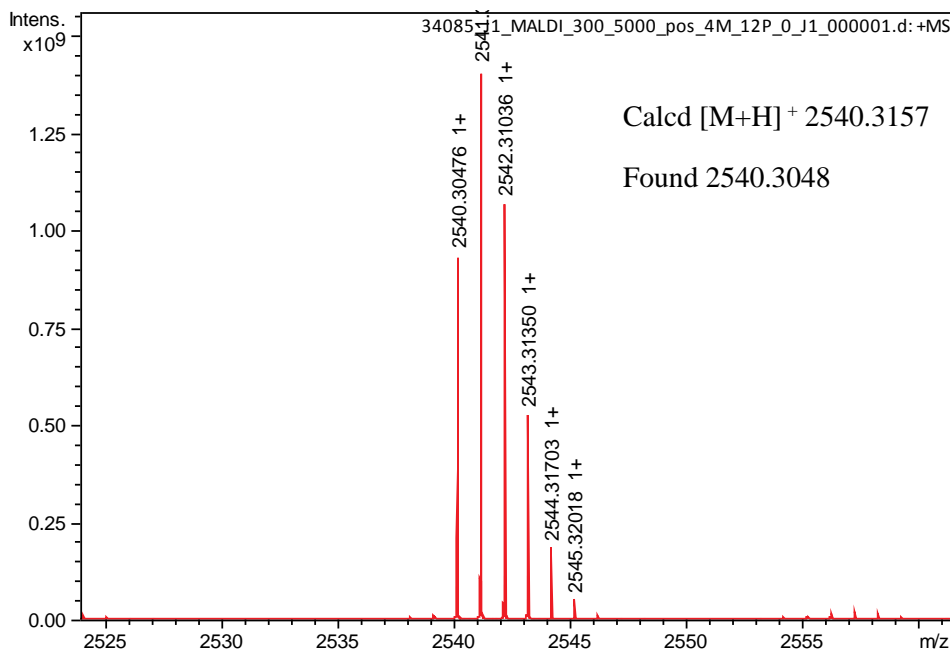

## FAM-Peptide 1

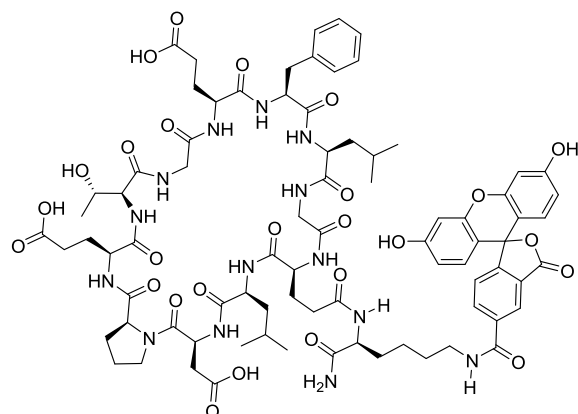

Chemical Formula:  $C_{80}H_{100}N_{14}O_{26}$   
Exact Mass: 1672.69332

Crude peptide on semi-preparative reversed-phase HPLC (monitored at 214 nm):

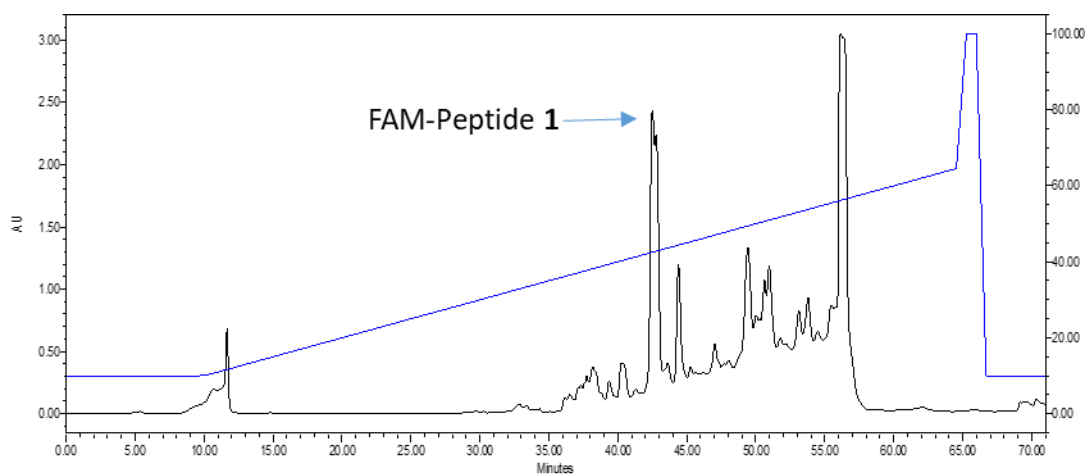

Purity check on analytical reversed-phase HPLC (214 nm):

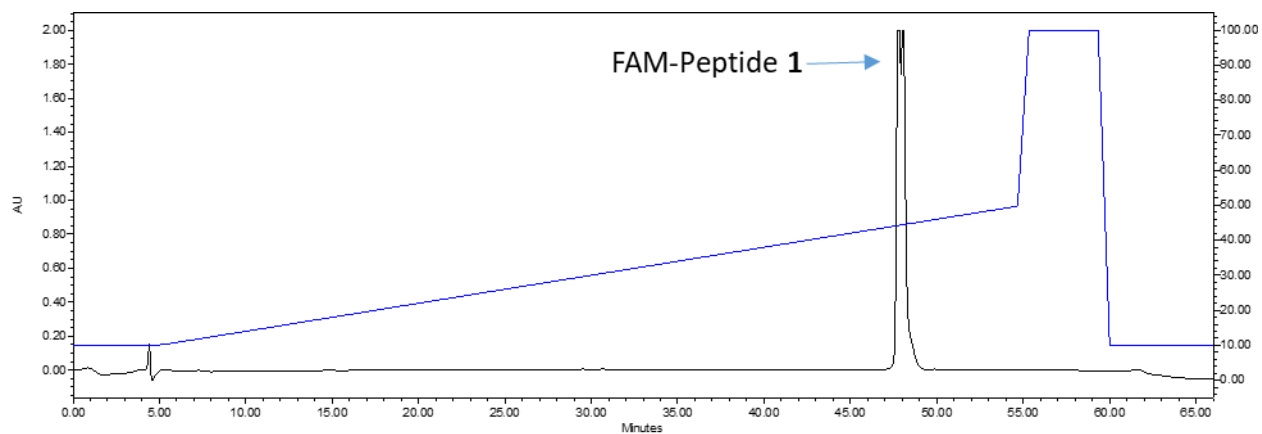

## HRMS:

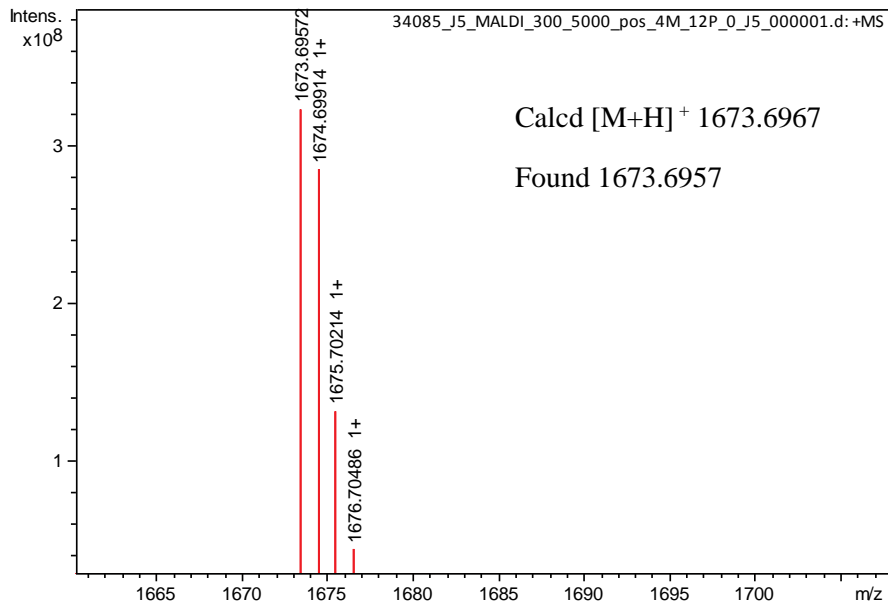

## FITC-Peptide 2

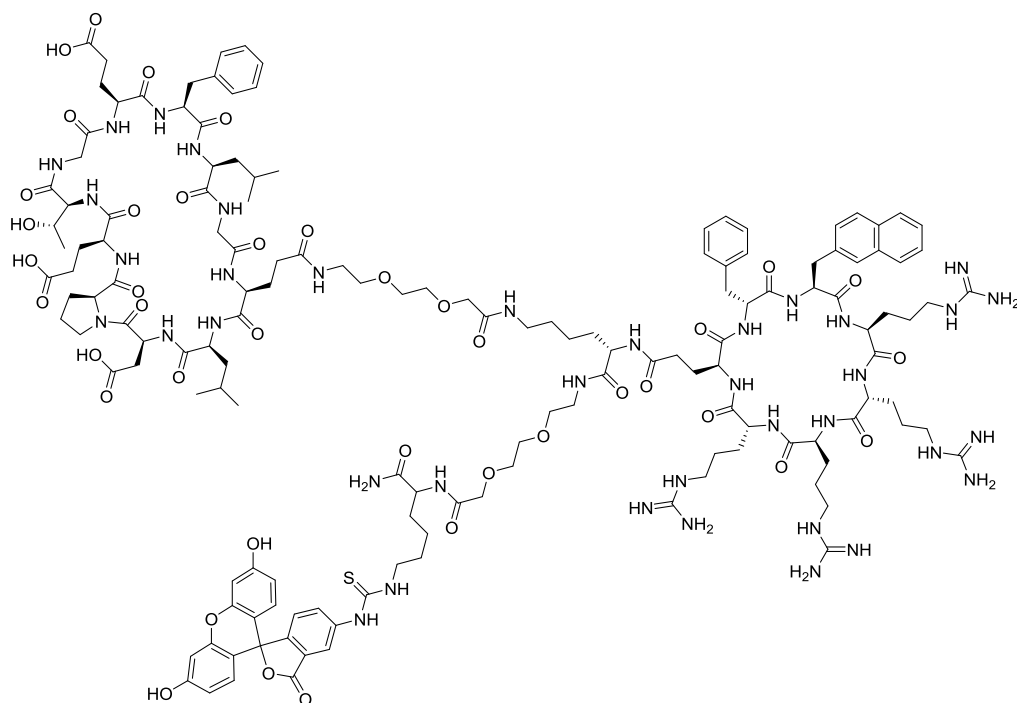

Crude peptide on semi-preparative reversed-phase HPLC (monitored at 214 nm):

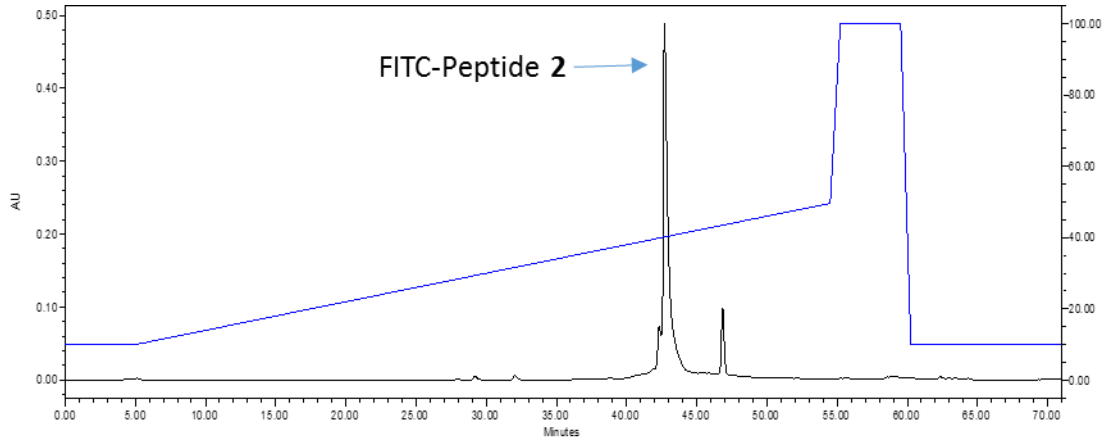

Purity check on analytical reversed-phase HPLC (214 nm):

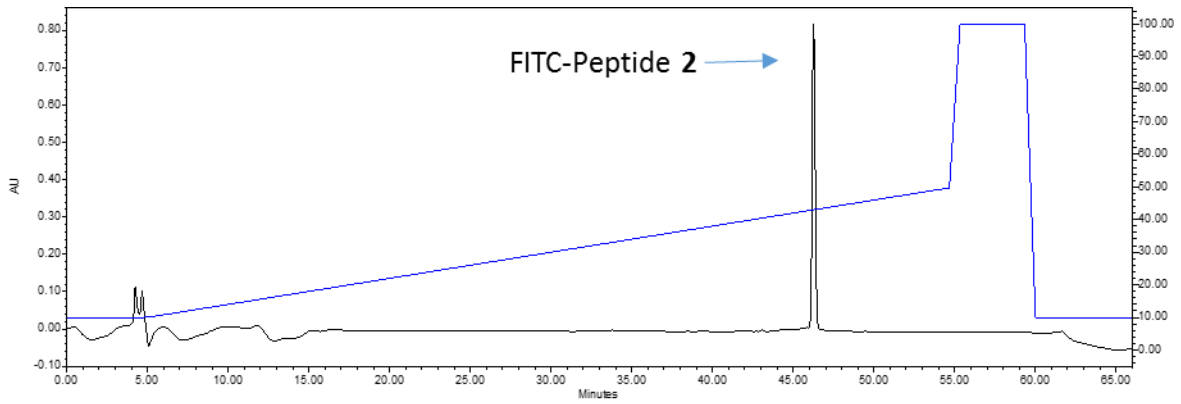

HRMS:

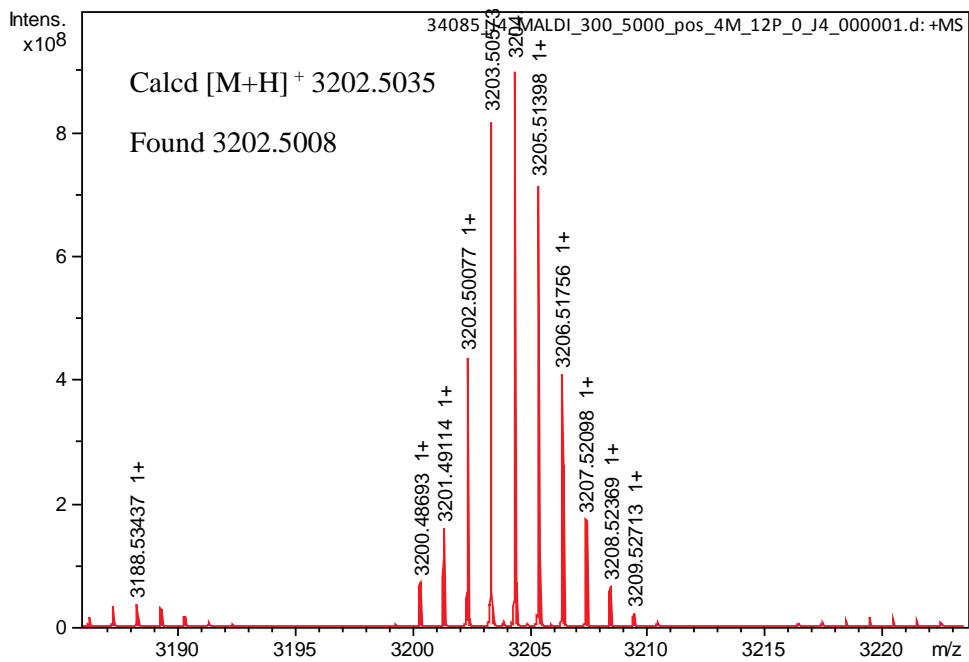

## NF-Peptide 1

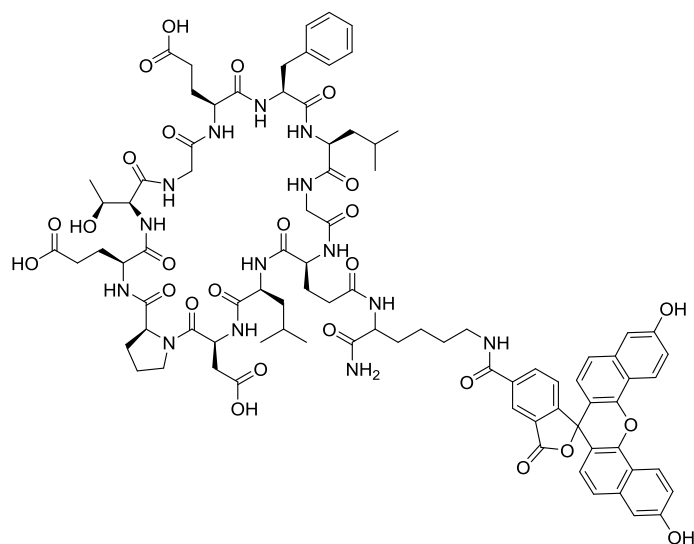

Chemical Formula:  $C_{88}H_{104}N_{14}O_{26}$   
Exact Mass: 1772.72462

Crude peptide on semi-preparative reversed-phase HPLC (monitored at 214 nm):

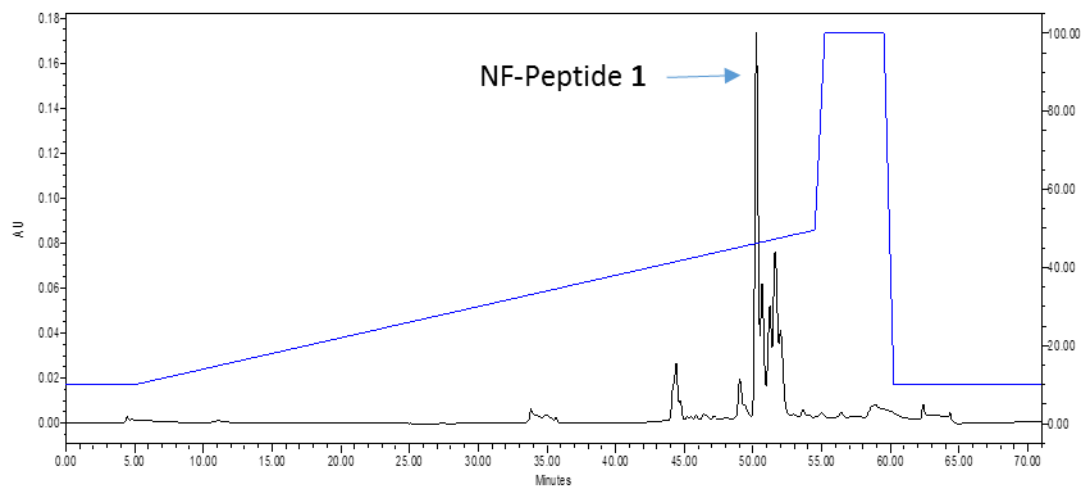

Purity check on analytical reversed-phase HPLC (214 nm):

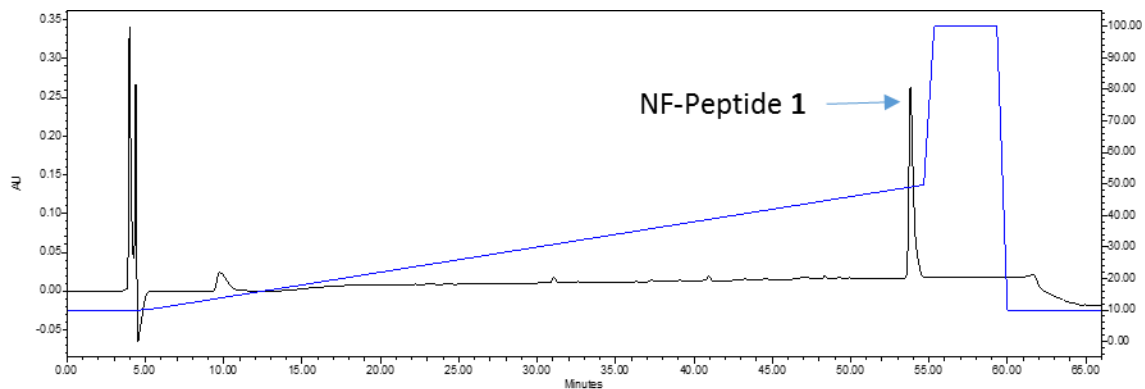





Crude peptide on semi-preparative reversed-phase HPLC (monitored at 214 nm):

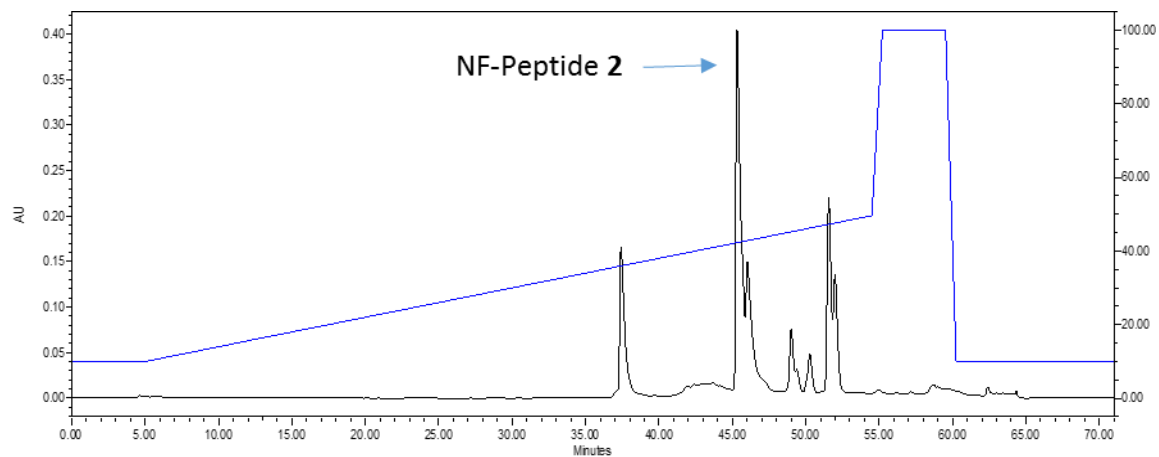

Purity check on analytical reversed-phase HPLC (214 nm):

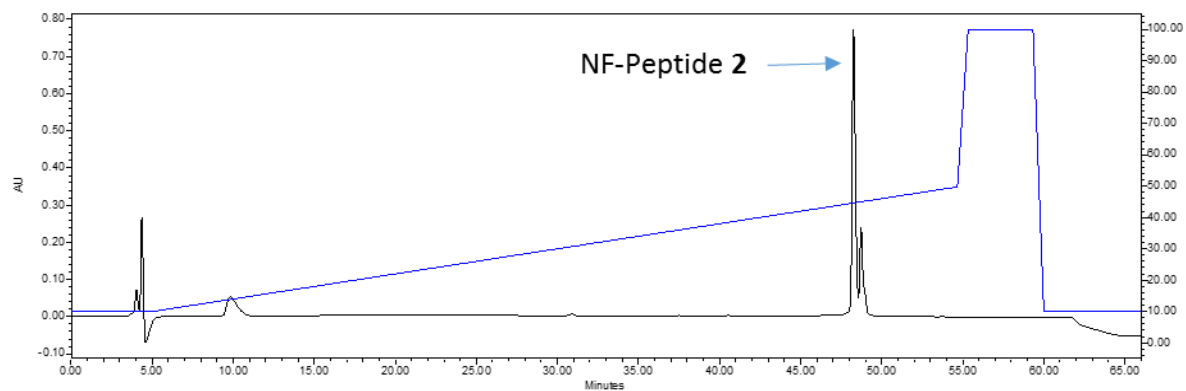

MS (low-resolution):

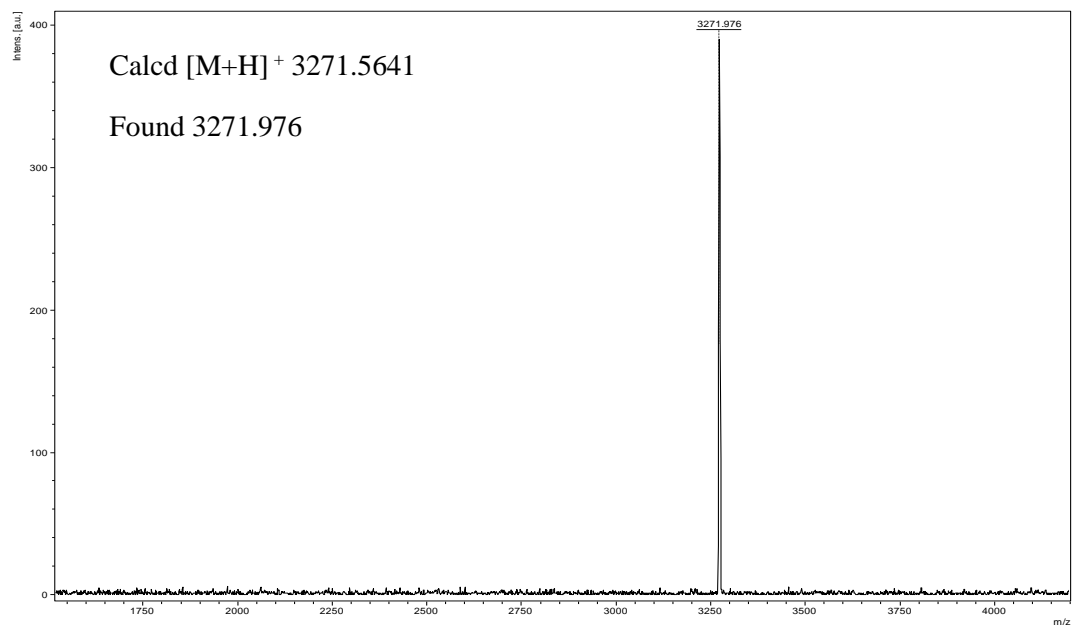

NF-CPP9

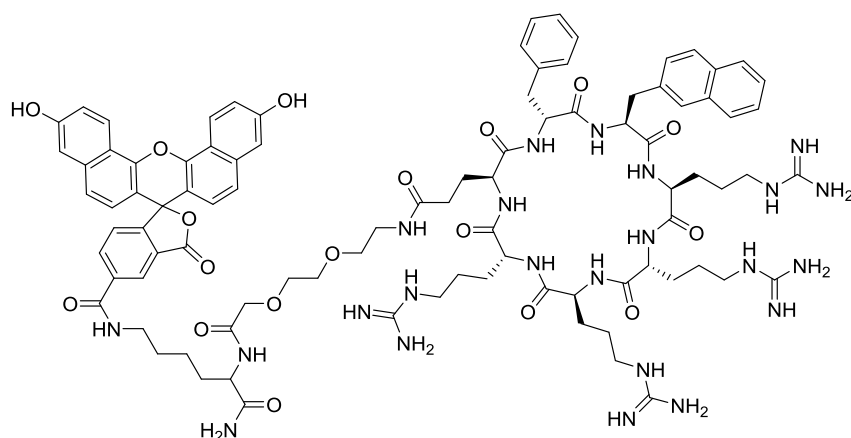

Crude peptide on semi-preparative reversed-phase HPLC (monitored at 214 nm):

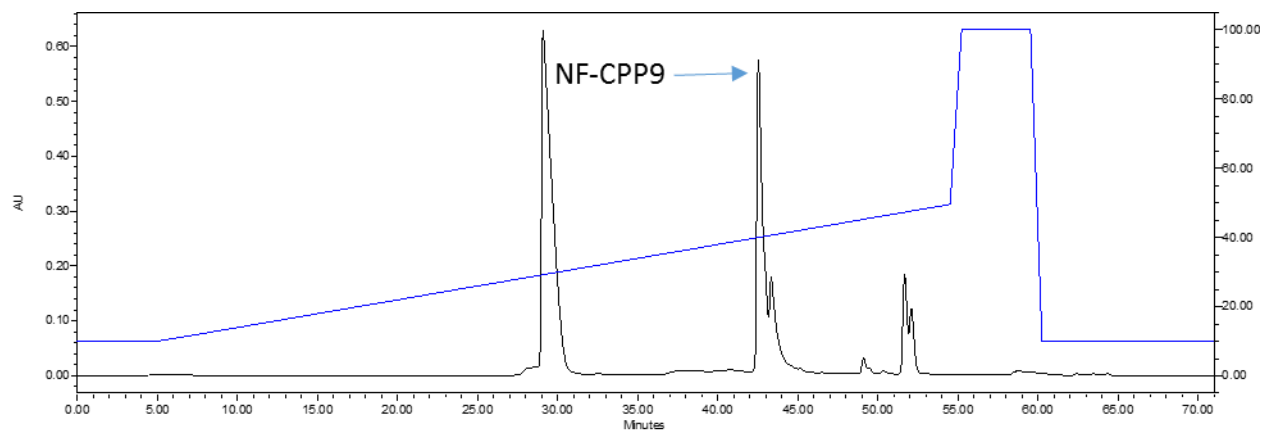

Purity check on analytical reversed-phase HPLC (214 nm):

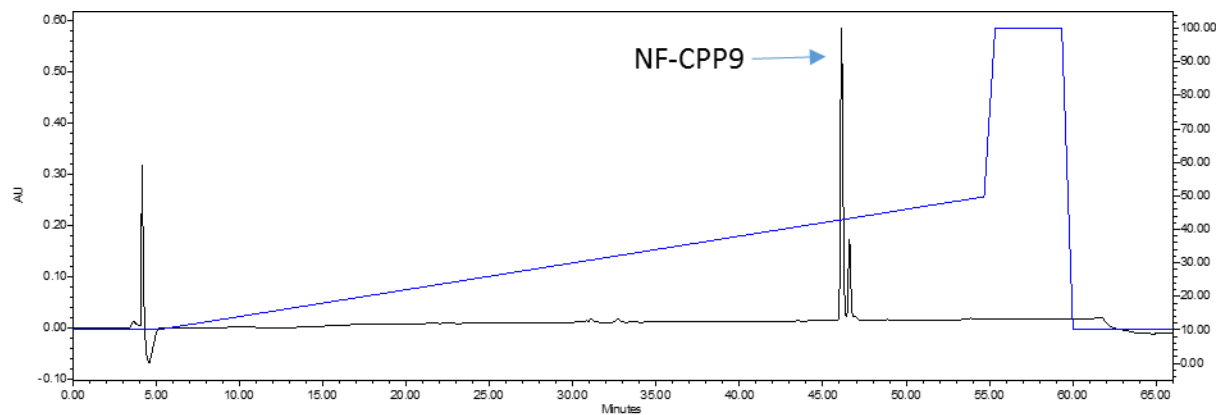

HRMS:

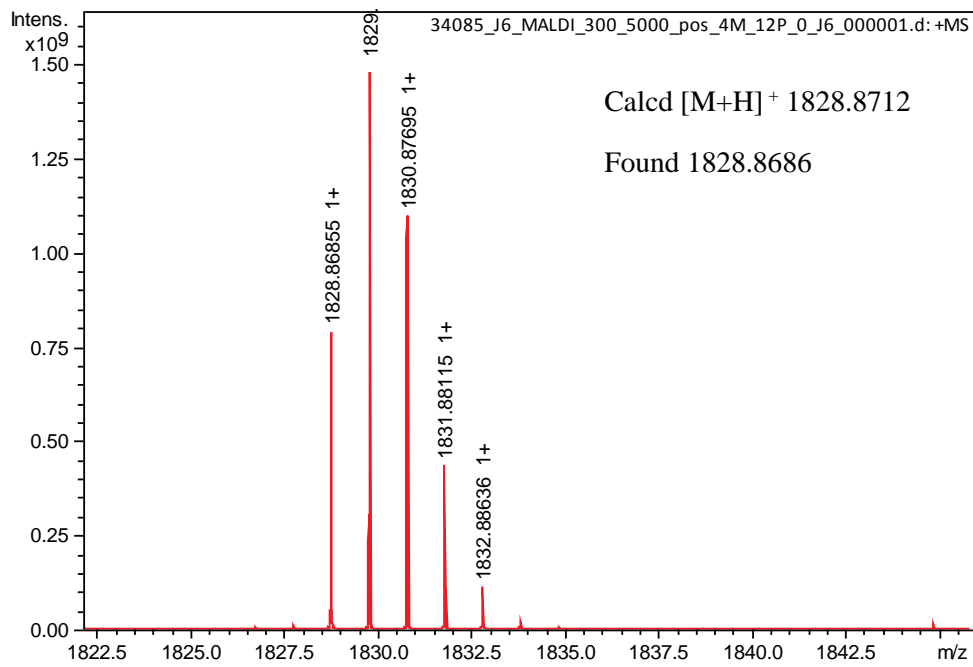

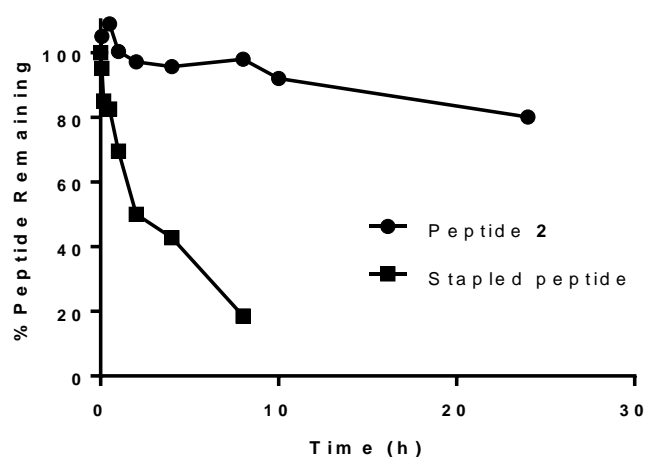

**Figure S2.** Serum stability of peptide 2 and a stapled peptide, Ac-GGYPED\*ILDK\*HLQRVIL-(miniPEG)<sub>2</sub>-Dap-CPP9, in which an amide bond is formed between the side chains of D\* and K\*.

*Procedure:* Human serum was diluted to 25% in sterile DPBS and incubated at 37 °C for 15 min. Peptide was added to the diluted serum to a final concentration of 100 μM and incubated at 37 °C with gentle mixing. Aliquots of 100 μL were withdrawn at various time points and mixed with 100 μL of 15% trichloroacetic acid in MeOH (w/v) and 100 μL of acetonitrile to quench the reaction. After overnight storage at 4 °C, aliquots were centrifuged at 15000 g for 5 min at 4°C and analyzed by RP-HPLC on a C18 column. The amount of remaining peptide was assessed by integration of the area under the peak in the HPLC chromatogram and comparing it with that at zero-time point.

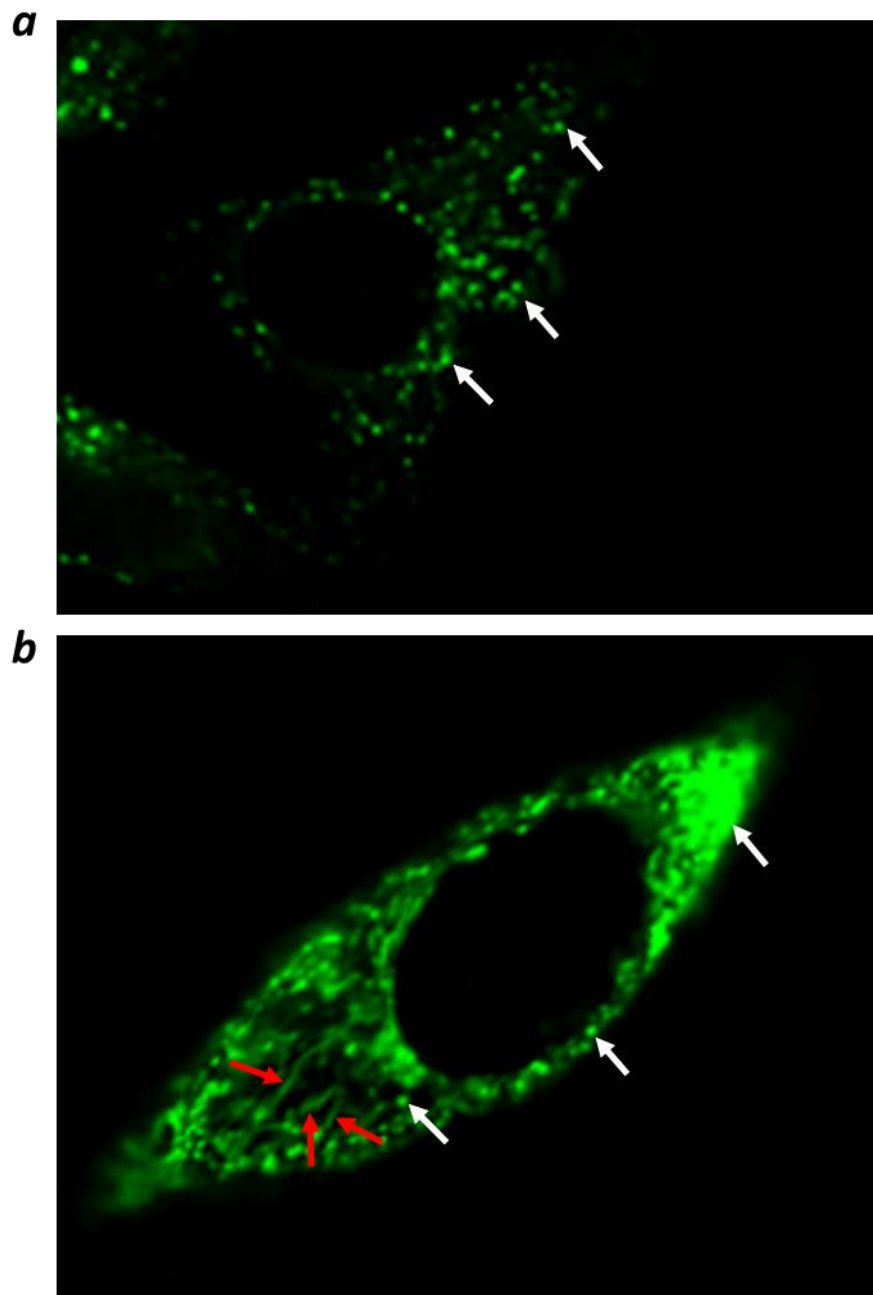

**Figure S3.** Enlarged confocal microscopy images from Figure 2 (main text) to show the differential intracellular localization of peptides **1** (a) and **2** (b). Representative round, intensely fluorescent structures (presumably endosomes and lysosomes) are indicated by white arrows, whereas the fibrous structures in (b) are marked with red arrows.

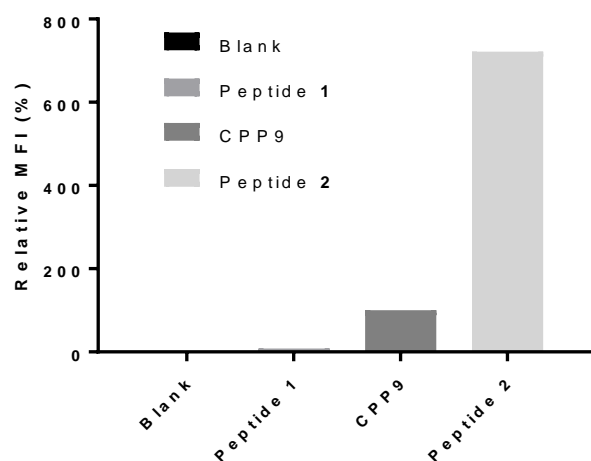

**Figure S4.** Cytosolic entry efficiencies of peptides **1** and **2**. HeLa cells were treated with 5  $\mu$ M NF-labeled peptide for 2 h in the presence of 10% FBS, washed, and suspended in a pH 6.5 buffer immediately before flow cytometry analysis. All MFI values are relative to that of CPP9-NF (100%).

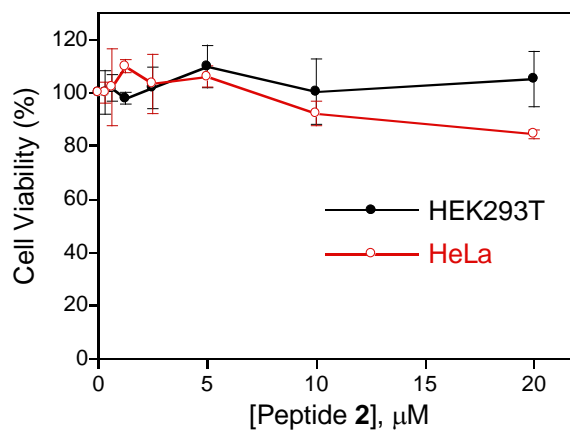

**Figure S5.** Effect of peptide **2** on the viability of HeLa and HEK293T cells as monitored by the MTT assay.
